# Supplementary material for: Charting the Cannabis plant chemical space with computational metabolomics
Source: Springer Nature journal article supplement (doi:10.1007/s11306-024-02125-y), 2024-05-25
Supplement: MOESM1 [file 11306_2024_2125_MOESM1_ESM-1.pdf]

## Charting the Cannabis plant chemical space with computational metabolomics

Akhona Myoli<sup>1</sup>, Mpho Choene<sup>1</sup>, Abidemi Paul Kappo<sup>1</sup>, Ntakadzeni Edwin Madala<sup>2</sup>, Justin J.J. van der Hooft<sup>1,3\*</sup>, Fidele Tugizimana<sup>1,4,5\*</sup>

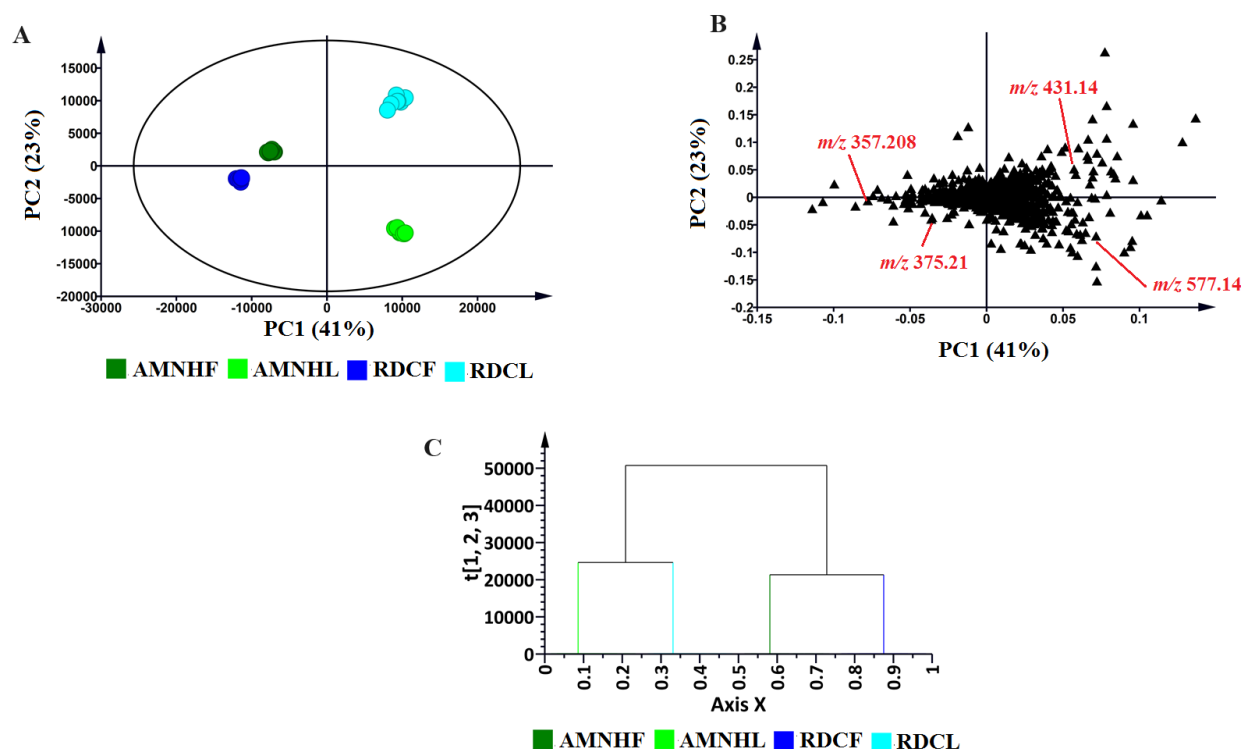

**Figure S1: Chemometrics modelling.** Unsupervised analysis and models of the ESI negative data of cannabis cultivars-Amnesia haze and Royal dutch cheese. **Key:** Amnesia haze leaves (AMNHL), Amnesia haze flowers (AMNHF), Royal dutch cheese leaves (RDCL) and Royal dutch cheese flowers (RDCF). (A) PCA scores plot and (B) loading score plot of the Pareto-scaled dataset of the two cultivars. The variables highlighted on the loadings plot are 6,7-epoxy-Cannabigerolic acid ( $m/z$  375.21), cannabidiolic acid ( $m/z$  357.208), vitexin ( $m/z$  431.14) and vitexin-2-O-rhamnoside (577.14). - (C) The HCA dendrogram indicating the hierarchical structure of the dataset. The PCA score plot explains  $R^2X = 78\%$  variation and  $Q^2 = 74\%$  predictive variation and the HCA corresponds to the variation shown on the PCA scores plot based on seven-fold cross-validation.

**GNPS molecular networking outputs (job links) for leaves (AMNHL and RDCL) and flowers (AMNHF and RDCF):**

FBMN of leaves ESI (-): ID=8cd7fb7a5f5c40e3881566fd2f11bc7d

<https://gnps.ucsd.edu/ProteoSAFe/status.jsp?task=8cd7fb7a5f5c40e3881566fd2f11bc7d>

FBMN of leaves ESI (+): ID=0e4fabaf54af45a9bc436f209efe5290  
<https://gnps.ucsd.edu/ProteoSAFe/status.jsp?task=0e4fabaf54af45a9bc436f209efe5290>

FBMN of flowers ESI (-): ID=0cd602dc592f460c97a5111d2000a5eb  
<https://gnps.ucsd.edu/ProteoSAFe/status.jsp?task=0cd602dc592f460c97a5111d2000a5eb>

FBMN of flowers ESI (+): ID=6b7f1c180143486692d975e285dcbd58  
<https://gnps.ucsd.edu/ProteoSAFe/status.jsp?task=6b7f1c180143486692d975e285dcbd58>

Combined FBMN ESI (-): ID=a268bab486d5414cb0e716f66fd37781  
<https://gnps.ucsd.edu/ProteoSAFe/status.jsp?task=a268bab486d5414cb0e716f66fd37781>

FBMN of leaves + vitexin standard ESI (-): ID=607fce1557fb46afbeadc69883f5f0df  
<https://gnps.ucsd.edu/ProteoSAFe/status.jsp?task=607fce1557fb46afbeadc69883f5f0df>

FBMN of flowers + vitexin standard ESI (-): ID=9155f3807fd745788840e2315d1192a1  
<https://gnps.ucsd.edu/ProteoSAFe/status.jsp?task=9155f3807fd745788840e2315d1192a1>

DEREPLICATOR + ESI (-) of leaves: ID=943eba0bdc69478b863c22afb7b365dd  
<https://gnps.ucsd.edu/ProteoSAFe/status.jsp?task=943eba0bdc69478b863c22afb7b365dd>

DEREPLICATOR + ESI (+) of leaves: ID=3f00c9f413a9402c9bf713a2b294bd2c  
<https://gnps.ucsd.edu/ProteoSAFe/status.jsp?task=3f00c9f413a9402c9bf713a2b294bd2c>

DEREPLICATOR + ESI (-) of flowers: ID=d6d817f90bc9494e9c5e0f87d477bd1c  
<https://gnps.ucsd.edu/ProteoSAFe/status.jsp?task=d6d817f90bc9494e9c5e0f87d477bd1c>

DEREPLICATOR + ESI (+) of flowers: ID=9ad720b8ec3c40d5abda2615c98c3365  
<https://gnps.ucsd.edu/ProteoSAFe/status.jsp?task=9ad720b8ec3c40d5abda2615c98c3365>

NAP ESI (-) of leaves: ID=378071d9403f44418b7594d6a91d4237  
<https://gnps.ucsd.edu/ProteoSAFe/status.jsp?task=378071d9403f44418b7594d6a91d4237>

NAP ESI (+) of leaves: ID=28f6d06b4cf84950971645ab4fbf281f  
<https://gnps.ucsd.edu/ProteoSAFe/status.jsp?task=28f6d06b4cf84950971645ab4fbf281f>

NAP ESI (-) of flowers: ID=4e851eb2d2524496b1a65c492eeeb784  
<https://gnps.ucsd.edu/ProteoSAFe/status.jsp?task=4e851eb2d2524496b1a65c492eeeb784>

NAP ESI (+) of flowers: ID=7011cdd48fb74bb487ce4db82e8bcb3a  
<https://gnps.ucsd.edu/ProteoSAFe/status.jsp?task=7011cdd48fb74bb487ce4db82e8bcb3a>

MS2LDA ESI (-) of leaves: ID=3ccc5c471c3041c1acc3fce8fc397856  
<https://gnps.ucsd.edu/ProteoSAFe/status.jsp?task=3ccc5c471c3041c1acc3fce8fc397856>

MS2LDA ESI (+) of leaves: ID=8cc3b956bcd24c15bcd00f0be4afc17c  
<https://gnps.ucsd.edu/ProteoSAFe/status.jsp?task=8cc3b956bcd24c15bcd00f0be4afc17c>

MS2LDA ESI (-) of flowers: ID=1684184ee24f47af9b812f12addaf821  
<https://gnps.ucsd.edu/ProteoSAFe/status.jsp?task=1684184ee24f47af9b812f12addaf821>

MS2LDA ESI (+) of flowers: ID=f71509557b4942b1ab147ed843fb63d7  
<https://gnps.ucsd.edu/ProteoSAFe/status.jsp?task=f71509557b4942b1ab147ed843fb63d7>

MS2LDA ESI (-) of leaves + vitexin standard: ID=29027ad86fa84025aa73df572862beac  
<https://gnps.ucsd.edu/ProteoSAFe/status.jsp?task=29027ad86fa84025aa73df572862beac>

MS2LDA ESI (-) of flowers + vitexin standard: ID=52bc3bbf53504151acfab5e167a3ef60  
<https://gnps.ucsd.edu/ProteoSAFe/status.jsp?task=52bc3bbf53504151acfab5e167a3ef60>

MolNetEnhancer ESI (-) of leave: ID=d65b3a5b5e7949b28f3ac672b59b2c60  
<https://gnps.ucsd.edu/ProteoSAFe/status.jsp?task=d65b3a5b5e7949b28f3ac672b59b2c60>

MolNetEnhancer ESI (-) of flowers: ID=e9634b2290f04e1bbd976a2e99866822  
<https://gnps.ucsd.edu/ProteoSAFe/status.jsp?task=e9634b2290f04e1bbd976a2e99866822>

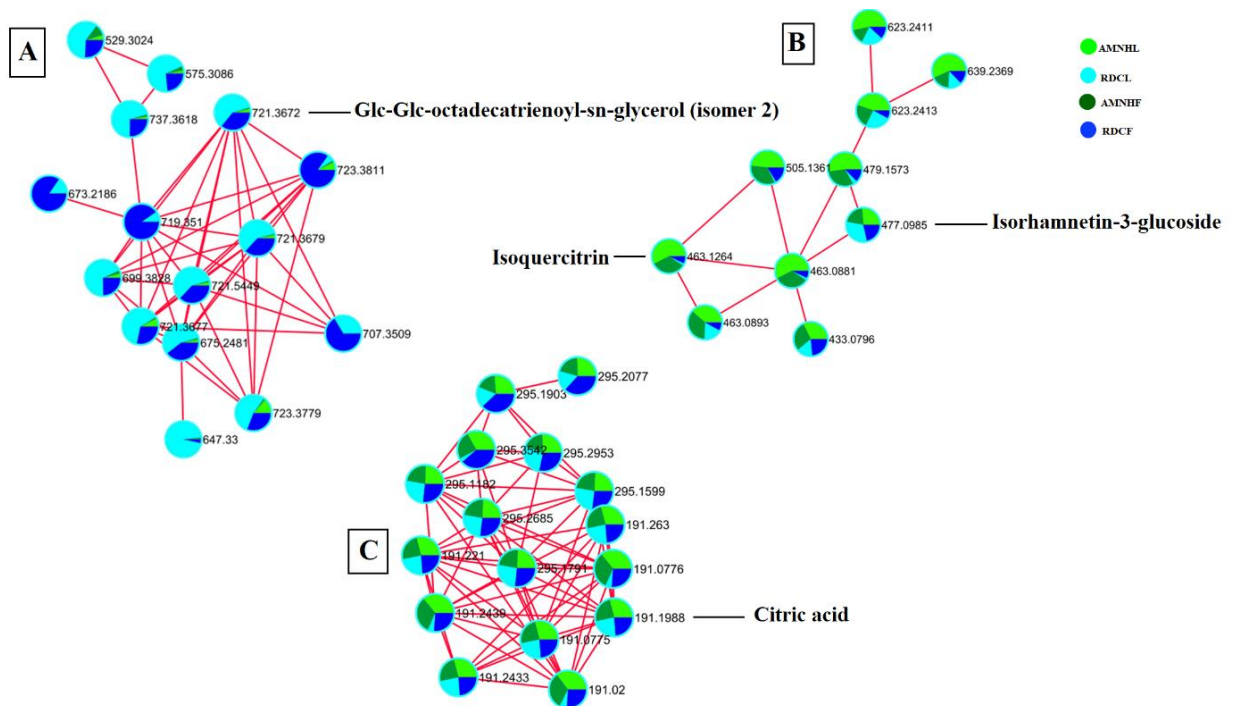

**Figure S2: Cannabis cultivar-specific and plant-tissue-specific metabolite differences.** A combined molecular network showing the relative quantification of some metabolites identified across the cultivars and their plant tissues. **Key:** Amnesia haze leaves (AMNHL), Amnesia haze flowers (AMNHF), Royal dutch cheese leaves (RDCL) and Royal dutch cheese flowers (RDCLF). (A) Shows lipid-like molecules to be more abundant in the plant tissues of RDC, (B) shows flavonoids such as isoquercitrin to be more abundant in the tissues of AMNH while (C) shows a cluster of hydroxy acids such as citric acid to occur in similar amounts across both the cultivars.

**Table S1:** All putatively annotated metabolites (level 2 and 3 MSI) in the plant-tissues of Amnesia haze (AMNH) and Royal dutch cheese (RDC) Presence (✓) and absence (✗) stating the distribution of metabolites and (\*) denotes the abbreviations used in **Figure S2**.

| No. | m/z      | Rt     | Adduct                                     | Chemical formular                                             | Fragment ions       | Putative annotations          | *Abbrev or alternative name | Superclass                     | Amnesia haze (AMNH) |         | Royal dutch cheese (RDC) |         |
|-----|----------|--------|--------------------------------------------|---------------------------------------------------------------|---------------------|-------------------------------|-----------------------------|--------------------------------|---------------------|---------|--------------------------|---------|
|     |          |        |                                            |                                                               |                     |                               |                             |                                | Leaves              | Flowers | Leaves                   | Flowers |
| 1   | 166.0854 | 2.422  | [M+H] <sup>+</sup>                         | C <sub>9</sub> H <sub>11</sub> NO <sub>2</sub>                | 120,107,103         | Phenylalanine                 | L-Phe                       | Organic acids and derivatives  | ✓                   | ✓       | ✓                        | ✓       |
| 2   | 205.0961 | 4.562  | [M+H] <sup>+</sup>                         | C <sub>11</sub> H <sub>12</sub> N <sub>2</sub> O <sub>2</sub> | 170,159,143,132,118 | L-Tryptophan                  | L-Trp                       | Organic acids and derivatives  | ✓                   | ✓       | ✓                        | ✓       |
| 3   | 313.218  | 13.01  | [M-H] <sup>-</sup>                         | C <sub>21</sub> H <sub>30</sub> O <sub>2</sub>                | 311,245,191,136     | Cannabidiol                   | CBD                         | lipid and lipid-like molecules | ✓                   | ✓       | ✓                        | ✓       |
| 4   | 389.198  | 10.48  | [M-H] <sup>-</sup>                         | C <sub>22</sub> H <sub>32</sub> O <sub>6</sub>                | 313,331,229,205     | Cannabitrilic acid            | CBTA                        | lipid and lipid-like molecules | ✓                   | ✓       | ✓                        | ✓       |
| 5   | 285.041  | 7.0955 | [M-H] <sup>-</sup>                         | C <sub>22</sub> H <sub>32</sub> O <sub>6</sub>                | 175,151,133         | Luteolin                      | Luteolin                    | Phenylpropanoids & polyketides | ✓                   | ✓       | ✓                        | ✓       |
| 6   | 431.1    | 6.897  | [M-H] <sup>-</sup> ,<br>[M+H] <sup>+</sup> | C <sub>21</sub> H <sub>20</sub> O <sub>10</sub>               | 117,283,161         | vitexin                       | Vit                         | Phenylpropanoids & polyketides | ✓                   | ✓       | ✓                        | ✓       |
| 7   | 329.183  | 11.66  | [M-H] <sup>-</sup>                         | C <sub>20</sub> H <sub>26</sub> O <sub>4</sub>                | 311,217,199,107     | Cannabidi-varinic acid        | CBDVA                       | lipid and lipid-like molecules | ✓                   | ✓       | ✓                        | ✓       |
| 8   | 357.208  | 16.50  | [M-H] <sup>-</sup>                         | C <sub>22</sub> H <sub>30</sub> O <sub>4</sub>                | 311,245,191,136     | Cannabidiolic acid            | CBDA                        | lipid and lipid-like molecules | ✓                   | ✓       | ✓                        | ✓       |
| 9   | 375.2188 | 11.412 | [M-H] <sup>-</sup>                         | C <sub>22</sub> H <sub>30</sub> O <sub>5</sub>                | 357,273,179,135,122 | 6,7-epoxy-Cannabigerolic acid | 6,7-Epoxy-CBGA              | lipid and lipid-like molecules | ✓                   | ✓       | ✓                        | ✓       |

|    |          |        |                    |                                                   |                     |                                                            |                           |                                |   |   |   |   |
|----|----------|--------|--------------------|---------------------------------------------------|---------------------|------------------------------------------------------------|---------------------------|--------------------------------|---|---|---|---|
| 10 | 315.0732 | 3.6545 | [M-H] <sup>-</sup> | C <sub>7</sub> H <sub>6</sub> O <sub>4</sub>      | 152,109,108         | 2,5-Dihydroxybenzoic acid                                  | 2,5-Dihydroxybenzoic acid | Organic acids and derivatives  | ✓ | ✗ | ✓ | ✗ |
| 11 | 721.3702 | 11.874 | [M-H] <sup>-</sup> | C <sub>33</sub> H <sub>56</sub> O <sub>14</sub>   | 675,415,397,277,235 | Glc-Glc-octadecatrienoyl-sn-glycerol (isomer 2)            | Glc-Glc-glycerol          | lipid and lipid-like molecules | ✓ | ✓ | ✓ | ✓ |
| 12 | 371.187  | 14.01  | [M-H] <sup>-</sup> | C <sub>23</sub> H <sub>32</sub> O <sub>4</sub>    | 353,327,259,191     | Cannabidiolic acid monomethyl ether                        | CBDMA                     | lipid and lipid-like molecules | ✓ | ✓ | ✓ | ✓ |
| 13 | 459.0943 | 8.783  | [M-H] <sup>-</sup> | C <sub>22</sub> H <sub>20</sub> O <sub>11</sub>   | 113,283,268,175     | Oroxindin                                                  | Oroxindin                 | Phenylpropanoids & polyketides | ✓ | ✗ | ✓ | ✗ |
| 14 | 312.13   | 7.6065 | [M-H] <sup>-</sup> | C <sub>18</sub> H <sub>19</sub> NO <sub>2</sub>   | 148,176,190         | Feruloyl-tyramine                                          | Ferulo-tyr                | Phenylpropanoids & polyketides | ✓ | ✓ | ✓ | ✓ |
| 15 | 447.09   | 6.547  | [M-H] <sup>-</sup> | C <sub>21</sub> H <sub>20</sub> O <sub>11</sub>   | 445                 | Orientin                                                   | Orientin                  | Phenylpropanoids & polyketides | ✓ | ✓ | ✓ | ✓ |
| 16 | 299.0566 | 7.8436 | [M-H] <sup>-</sup> | C <sub>16</sub> H <sub>12</sub> O <sub>6</sub>    | 285,284             | Diosmetin                                                  | Diosmetin                 | Phenylpropanoids & polyketides | ✓ | ✗ | ✓ | ✗ |
| 17 | 577.1533 | 6.9476 | [M-H] <sup>-</sup> | C <sub>27</sub> H <sub>30</sub> O <sub>14</sub>   | 413,293,173         | Vitexin-2-O-rhamnoside                                     | Vit-2-O-rhamn             | Phenylpropanoids & polyketides | ✓ | ✓ | ✓ | ✓ |
| 18 | 593.9265 | 6.329  | [M-H] <sup>-</sup> | C <sub>27</sub> H <sub>30</sub> O <sub>15</sub>   | 503,473,383,353     | Vicenin 2                                                  | Vic-2                     | Phenylpropanoids & polyketides | ✓ | ✗ | ✓ | ✗ |
| 19 | 452.2905 | 12.601 | [M+H] <sup>+</sup> | C <sub>21</sub> H <sub>44</sub> NO <sub>7</sub> P | 313                 | 1-Palmitoyl-2-hydroxy-sn-glycero-3-phosphoethanolamine     | 1-Pal-hydrogly-phos       | lipid and lipid-like molecules | ✓ | ✗ | ✓ | ✗ |
| 20 | 597.3066 | 12.99  | [M-H] <sup>-</sup> | C <sub>27</sub> H <sub>51</sub> O <sub>12</sub> P | 315,281,241,154     | 1-(9Z-Octadecenoyl)-sn-glycero-3-phospho-(1'-myo-inositol) | 9Z-Octa-1-myo-inositol    | lipid and lipid-like molecules | ✓ | ✗ | ✓ | ✗ |

|    |          |        |                                            |                                                   |                     |                                                                                                      |                            |                                |   |   |   |   |
|----|----------|--------|--------------------------------------------|---------------------------------------------------|---------------------|------------------------------------------------------------------------------------------------------|----------------------------|--------------------------------|---|---|---|---|
| 21 | 509.2904 | 13.126 | [M-H] <sup>-</sup>                         | C <sub>24</sub> H <sub>47</sub> O <sub>9</sub> P  | 281,227,153         | 1-(9Z-Octadecenoyl)-sn-glycero-3-phospho-(1'-sn-glycerol)                                            | 9Z-Octa-1-sn-glycerol      | lipid and lipid-like molecules | ✓ | ✗ | ✓ | ✗ |
| 22 | 571.2912 | 12.864 | [M-H] <sup>-</sup>                         | C <sub>25</sub> H <sub>49</sub> O <sub>12</sub> P | 391,315,255,241,153 | 1-Hexadecanoyl-sn-glycero-3-phospho-(1'-myo-inositol)                                                | 1-Hexaphopho-1-myoinositol | lipid and lipid-like molecules | ✓ | ✗ | ✓ | ✗ |
| 23 | 493.1    | 6.611  | [M+FA-H] <sup>-</sup>                      | C <sub>21</sub> H <sub>20</sub> O <sub>11</sub>   | 447,357,327         | Luteolin-6-c-glucoside                                                                               | Lut-6-glu                  | Phenylpropanoids & polyketides | ✓ | ✓ | ✓ | ✓ |
| 24 | 483.2749 | 12.698 | [M-H] <sup>-</sup>                         | C <sub>22</sub> H <sub>45</sub> O <sub>9</sub> P  | 255,245,227,153     | 1-Hexadecanoyl-sn-glycero-3-phospho-(1'-sn-glycerol)                                                 | 1-Hexaphopho-1-sn-gly      | lipid and lipid-like molecules | ✓ | ✓ | ✓ | ✓ |
| 25 | 437.1823 | 9.908  | [M+H] <sup>+</sup> ,<br>[M-H] <sup>-</sup> | C <sub>26</sub> H <sub>28</sub> O <sub>6</sub>    | 313,289,299         | Cannflavin A                                                                                         | Cannflavin A               | Phenylpropanoids & polyketides | ✓ | ✓ | ✓ | ✓ |
| 26 | 549.2557 | 7.307  | [M+FA-H] <sup>-</sup>                      | C <sub>24</sub> H <sub>40</sub> O <sub>11</sub>   | 527                 | 2-Cyclohexen-1-one, 3,5,5-trimethyl-4-[3-[(6-O-beta-D-xylopyranosyl-beta-D-glucopyranosyl)oxy]butyl] | 2-cycl-1-one               | lipid and lipid-like molecules | ✓ | ✓ | ✓ | ✓ |
| 27 | 353.0889 | 5.113  | [M-H] <sup>-</sup>                         | C <sub>16</sub> H <sub>18</sub> O <sub>9</sub>    | 179,191,135         | Caffeoylquinic acid                                                                                  | Caffeo-quinic acid         | Phenylpropanoids & polyketides | ✓ | ✓ | ✓ | ✓ |
| 28 | 591.1811 | 7.4177 | [M-H] <sup>-</sup>                         | C <sub>28</sub> H <sub>32</sub> O <sub>14</sub>   | 504,427,367,326,307 | 2-O-rhamnosyl-swertisin                                                                              | 2-O-rhamnswert             | Phenylpropanoids & polyketides | ✓ | ✗ | ✓ | ✗ |

|    |          |        |                         |                                                   |                     |                                               |                             |                                |   |   |   |   |
|----|----------|--------|-------------------------|---------------------------------------------------|---------------------|-----------------------------------------------|-----------------------------|--------------------------------|---|---|---|---|
| 29 | 327.2178 | 9.546  | [M-H] <sup>-</sup>      | C <sub>18</sub> H <sub>32</sub> O <sub>5</sub>    | 211,229,183,171     | 9,12,13-trihydroxyoctadeca-10,15-dienoic acid | Trihydroxy-octa-dienic-acid | lipid and lipid-like molecules | ✓ | ✓ | ✓ | ✓ |
| 30 | 367.1447 | 7.1555 | [M-H] <sup>-</sup>      | C <sub>17</sub> H <sub>20</sub> O <sub>9</sub>    | 191,173,193,134     | Feruloyl quinic acid (isomer of 887, 888)     | Ferul-qui-acid              | Phenylpropanoids & polyketides | ✓ | ✓ | ✓ | ✓ |
| 31 | 433.0768 | 7.234  | [M-H] <sup>-</sup>      | C <sub>20</sub> H <sub>18</sub> O <sub>11</sub>   | 300,271,255,301     | Guajaverin                                    | Guajaverin                  | Phenylpropanoids & polyketides | ✓ | ✓ | ✓ | ✓ |
| 32 | 609.146  | 7.01   | [M-H] <sup>-</sup>      | C <sub>27</sub> H <sub>30</sub> O <sub>16</sub>   | 300,271,151         | Quercetin-3-rutinoside                        | Quercetin-3-rut             | Phenylpropanoids & polyketides | ✓ | ✓ | ✓ | ✓ |
| 33 | 709.3739 | 13.118 | [2M-2H+Na] <sup>-</sup> | C <sub>18</sub> H <sub>16</sub> O <sub>7</sub>    | 343,299,301         | Usnic acid                                    | Usnic acid                  | Benzenoids                     | ✗ | ✓ | ✗ | ✓ |
| 34 | 773.3542 | 11.315 | [2M-Na] <sup>-</sup>    | C <sub>19</sub> H <sub>20</sub> O <sub>8</sub>    | 375                 | Pseudo-placodiolic acid                       | Pseudo-plac-acid            | Benzenoids                     | ✗ | ✓ | ✗ | ✓ |
| 35 | 577.1346 | 5.557  | [M-H] <sup>-</sup>      | C <sub>30</sub> H <sub>26</sub> O <sub>12</sub>   | 451,425,407,289,161 | Procyanidin B1                                | Procyanidin B               | Phenylpropanoids & polyketides | ✓ | ✓ | ✓ | ✓ |
| 36 | 452.28   | 12.268 | [M-H] <sup>-</sup>      | C <sub>21</sub> H <sub>44</sub> NO <sub>7</sub> P | 255,213             | Phosphatidylethanolamine                      | Lyso 16:0                   | lipid and lipid-like molecules | ✓ | ✓ | ✓ | ✓ |
| 37 | 477.1033 | 7.677  | [M-H] <sup>-</sup>      | C <sub>22</sub> H <sub>22</sub> O <sub>12</sub>   | 315,314,285,271     | Isorhamnetin-3-glucoside                      | Isorhamn-3-glu              | Phenylpropanoids & polyketides | ✓ | ✓ | ✓ | ✓ |
| 38 | 289.07   | 5.976  | [M-H] <sup>-</sup>      | C <sub>15</sub> H <sub>14</sub> O <sub>6</sub>    | 287,245,137,125,109 | (-)-Epicatechin                               | Epicatechin                 | Phenylpropanoids & polyketides | ✓ | ✓ | ✓ | ✓ |
| 39 | 463.09   | 7.219  | [M-H] <sup>-</sup>      | C <sub>21</sub> H <sub>20</sub> O <sub>12</sub>   | 301,271,255         | Isoquercitrin                                 | Isoquercitrin               | Phenylpropanoids & polyketides | ✓ | ✓ | ✓ | ✓ |
| 40 | 579.1498 | 5.997  | 2[M-H] <sup>-</sup>     | C <sub>15</sub> H <sub>14</sub> O <sub>6</sub>    | 289,245,125         | Catechin dimer                                | 2XCatechin                  | Phenylpropanoids & polyketides | ✓ | ✓ | ✓ | ✓ |

|    |          |        |                     |                                                   |                         |                                                                  |                        |                                |   |   |   |   |
|----|----------|--------|---------------------|---------------------------------------------------|-------------------------|------------------------------------------------------------------|------------------------|--------------------------------|---|---|---|---|
| 41 | 223.097  | 9.534  | [M-H] <sup>-</sup>  | C <sub>12</sub> H <sub>16</sub> O <sub>4</sub>    | 179,137                 | Olivetolic acid                                                  | Olivet-acid            | Phenylpropanoids & polyketides | ✗ | ✓ | ✗ | ✓ |
| 42 | 553.1658 | 9.634  | [M-H] <sup>-</sup>  | C <sub>25</sub> H <sub>30</sub> O <sub>14</sub>   | 391,373,347             | Ligustrosidic acid                                               | Ligus-acid             | lipid and lipid-like molecules | ✗ | ✓ | ✗ | ✓ |
| 43 | 403.1309 | 6.819  | [M-H] <sup>-</sup>  | C <sub>17</sub> H <sub>24</sub> O <sub>11</sub>   | 101,113,119,179,223     | Oleoside 11-methyl ester                                         | Oleo-methyl-ester      | lipid and lipid-like molecules | ✗ | ✓ | ✗ | ✓ |
| 44 | 617.1451 | 6.685  | [M-Na] <sup>+</sup> | C <sub>27</sub> H <sub>30</sub> O <sub>15</sub>   | 455,437,599             | Saponarin                                                        | Saponarin              | Phenylpropanoids & polyketides | ✓ | ✓ | ✓ | ✓ |
| 45 | 601.1513 | 6.847  | [M-Na] <sup>+</sup> | C <sub>30</sub> H <sub>26</sub> O <sub>12</sub>   | 583,481,455             | Vitexin 2"-O-p-coumarate                                         | Vit-2-O-coumarate      | Phenylpropanoids & polyketides | ✓ | ✓ | ✓ | ✓ |
| 46 | 524.3703 | 13.216 | [M+H] <sup>+</sup>  | C <sub>26</sub> H <sub>54</sub> NO <sub>7</sub> P | 524,184,104             | 1-Octadecanoyl-sn-glycero-3-phosphocholine                       | 1-Octadec-gly-phospho  | lipid and lipid-like molecules | ✓ | ✓ | ✓ | ✓ |
| 47 | 461.074  | 7.139  | [M-H] <sup>-</sup>  | C <sub>21</sub> H <sub>18</sub> O <sub>12</sub>   | 285,229                 | Kaempferol 3-glucuronoside                                       | Kaemp-3-glu            | Phenylpropanoids & polyketides | ✓ | ✓ | ✓ | ✓ |
| 48 | 518.3212 | 12.699 | [M+Na] <sup>+</sup> | C <sub>24</sub> H <sub>50</sub> NO <sub>7</sub> P | 459,313,184,146,104     | 1-Hexadecanoyl-sn-glycero-3-phosphocholine                       | 1-Hexadec-gly-phospho  | lipid and lipid-like molecules | ✓ | ✓ | ✓ | ✓ |
| 49 | 311.2076 | 13.98  | [M+H] <sup>+</sup>  | C <sub>21</sub> H <sub>26</sub> O <sub>2</sub>    | 223,121,109             | Cannabinol                                                       | CBN                    | lipid and lipid-like molecules | ✓ | ✓ | ✓ | ✓ |
| 50 | 341.2101 | 17.01  | [M+H] <sup>+</sup>  | C <sub>22</sub> H <sub>29</sub> O <sub>3</sub>    | 341,285,219,161         | Tetrahydrocannabinolic acid-acylium ion (Δ <sup>9</sup> -THCA-1) | Δ <sup>9</sup> -THCA-1 | lipid and lipid-like molecules | ✓ | ✓ | ✓ | ✓ |
| 51 | 341.2104 | 12.04  | [M+H] <sup>+</sup>  | C <sub>22</sub> H <sub>29</sub> O <sub>3</sub>    | 229,219,161,117         | Cannabidiolic acid-actrylium ion (CBDA-1)                        | CBDA-1                 | lipid and lipid-like molecules | ✓ | ✓ | ✓ | ✓ |
| 52 | 359.2209 | 17.38  | [M+H] <sup>+</sup>  | C <sub>22</sub> H <sub>30</sub> O <sub>4</sub>    | 285,261,219,135         | Canna-bicycliolic acid                                           | CBLA                   | lipid and lipid-like molecules | ✓ | ✓ | ✓ | ✓ |
| 53 | 463.3242 | 7.593  | [M+H] <sup>+</sup>  | C <sub>21</sub> H <sub>18</sub> O <sub>12</sub>   | 343,313,287             | Breviscapine                                                     | Breviscapine           | Phenylpropanoids & polyketides | ✓ | ✓ | ✓ | ✓ |
| 54 | 338.412  | 14.336 | [M+H] <sup>+</sup>  | C <sub>22</sub> H <sub>43</sub> NO                | 149,163,135,121,114,107 | Erucamide                                                        | Erucamide              | lipid and lipid-like molecules | ✓ | ✗ | ✓ | ✗ |

|    |          |         |                                          |                                                   |                         |                                      |                             |                                |   |   |   |   |
|----|----------|---------|------------------------------------------|---------------------------------------------------|-------------------------|--------------------------------------|-----------------------------|--------------------------------|---|---|---|---|
| 55 | 353.2079 | 12.151  | [M+H] <sup>+</sup>                       | C <sub>21</sub> H <sub>36</sub> O <sub>4</sub>    | 261,243,173,149,121,107 | Monolinolenin                        | Monolin                     | lipid and lipid-like molecules | ✓ | ✓ | ✓ | ✓ |
| 56 | 315.231  | 15.43   | [M+H] <sup>+</sup>                       | C <sub>21</sub> H <sub>30</sub> O <sub>2</sub>    | 193,135,123,109,107     | Δ <sup>9</sup> -Tetrahydrocannabinol | Δ <sup>9</sup> -THC         | lipid and lipid-like molecules | ✗ | ✓ | ✗ | ✓ |
| 57 | 355.1897 | 15.93   | [M+H] <sup>+</sup>                       | C <sub>22</sub> H <sub>26</sub> O <sub>4</sub>    | 337,313,253,219         | Cannabinolic acid                    | CBDA                        | lipid and lipid-like molecules | ✓ | ✓ | ✓ | ✓ |
| 58 | 522.3542 | 12.708  | [M+H] <sup>+</sup>                       | C <sub>26</sub> H <sub>52</sub> NO <sub>7</sub> P | 504,184,125,104         | 1-oleoyl-glycero-3-phosphocholine    | 1-Oleo-gly-3-phosphocholine | lipid and lipid-like molecules | ✗ | ✓ | ✗ | ✓ |
| 59 | 601.13   | 5.271   | [M+Na] <sup>+</sup>                      | C <sub>30</sub> H <sub>26</sub> O <sub>12</sub>   | 311,449,313             | Procyanidin B2                       | Procy-B2                    | Phenylpropanoids & polyketides | ✗ | ✓ | ✗ | ✓ |
| 60 | 796.45   | 14.938  | [M+H] <sup>+</sup>                       | C <sub>42</sub> H <sub>66</sub> O <sub>14</sub>   | 735,517                 | Tenacissoside H                      | Tena-H                      | lipid and lipid-like molecules | ✓ | ✓ | ✓ | ✓ |
| 61 | 395.26   | 11.614  | [M+H] <sup>+</sup>                       | C <sub>19</sub> H <sub>22</sub> O <sub>9</sub>    | 377,359,352             | Aloesin                              | Aloesin                     | Organoheterocyclic compounds   | ✗ | ✓ | ✗ | ✓ |
| 62 | 413.2298 | 11.772  | [M+Na] <sup>+</sup>                      | C <sub>23</sub> H <sub>34</sub> O <sub>5</sub>    | 395,377,231,149         | Gitoxigenin                          | Gitox                       | lipid and lipid-like molecules | ✓ | ✓ | ✓ | ✓ |
| 63 | 219.1733 | 9       | [M+Na] <sup>+</sup>                      | C <sub>12</sub> H <sub>20</sub> O <sub>2</sub>    | 159,145,133,131,119,105 | Linalyl butyrate                     | Lin-buty                    | Organic acids and derivatives  | ✗ | ✓ | ✗ | ✓ |
| 64 | 439.2295 | 7.331   | [M+H] <sup>+</sup>                       | C <sub>21</sub> H <sub>26</sub> O <sub>10</sub>   | 277,259,203             | Monnieriside G                       | Monn-G                      | Phenylpropanoids & polyketides | ✓ | ✓ | ✓ | ✓ |
| 65 | 563.5502 | 13.1255 | 2[M+H] <sup>+</sup>                      | C <sub>18</sub> H <sub>35</sub> NO                | 282,265,247,135,109     | 9-Octadecenamide                     | 9-Octade                    | lipid and lipid-like molecules | ✗ | ✓ | ✗ | ✓ |
| 66 | 182.0805 | 1.276   | [M+H] <sup>+</sup>                       | C <sub>9</sub> H <sub>11</sub> NO <sub>3</sub>    | 147,136,123,119,107,103 | L-Tyrosine                           | L-Tyr                       | Organic acids and derivatives  | ✓ | ✓ | ✓ | ✓ |
| 67 | 369.110  | 11.712  | [M+H] <sup>+</sup><br>[M-H] <sup>-</sup> | C <sub>21</sub> H <sub>20</sub> O <sub>6</sub>    | 313,298,165             | Cannflavin B                         | Cannflavin-B                | Phenylpropanoids & polyketides | ✓ | ✓ | ✓ | ✓ |

|    |          |       |                    |                                                 |                         |                                        |              |                                |   |   |   |   |
|----|----------|-------|--------------------|-------------------------------------------------|-------------------------|----------------------------------------|--------------|--------------------------------|---|---|---|---|
| 68 | 563.1410 | 5.855 | [M-H] <sup>-</sup> | C <sub>26</sub> H <sub>28</sub> O <sub>14</sub> | 449,281,223,<br>163,135 | Apigenin<br>glucoside<br>arabinoside   | Api-glu-arab | Phenylpropanoids & polyketides | ✓ | ✓ | ✓ | ✓ |
| 69 | 593.1520 | 6.553 | [M-H] <sup>-</sup> | C <sub>27</sub> H <sub>30</sub> O <sub>15</sub> | 473,429,327,3<br>09     | Luteolin-7-<br>rutinoside              | Lut-7-rut    | Phenylpropanoids & polyketides | ✓ | ✓ | ✓ | ✓ |
| 70 | 609.1470 | 6.651 | [M-H] <sup>-</sup> | C <sub>27</sub> H <sub>30</sub> O <sub>16</sub> | 489,429,327,<br>309     | Luteolin-<br>glucoside-<br>arabinoside | Lut-glu-arab | Phenylpropanoids & polyketides | ✓ | ✓ | ✓ | ✓ |
| 71 | 299.057  | 9.09  | [M-H] <sup>-</sup> | C <sub>16</sub> H <sub>12</sub> O <sub>6</sub>  | 285,284,256             | Chrysoeriol                            | Chrysoeriol  | Phenylpropanoids & polyketides | ✗ | ✓ | ✗ | ✓ |
| 72 | 191.1980 | 1.02  | [M-H] <sup>-</sup> | C <sub>6</sub> H <sub>8</sub> O <sub>7</sub>    | 147, 129, 87            | Citric acid                            | Citric acid  | Organic acids and derivatives  | ✓ | ✓ | ✓ | ✓ |

**Table S2:** Significant metabolic pathways in cannabis cultivars Amnesia haze (AMNH) and Royal dutch cheese (RDC) based on the KEGG IDs of metabolites identified in the leaves and flowers of the cultivars.

| No. | Pathway                                               | Total | Hits | <i>p</i> -value | Impact  |
|-----|-------------------------------------------------------|-------|------|-----------------|---------|
| 1   | Flavone and flavonol biosynthesis                     | 10    | 2    | 8.4457E-4       | 0       |
| 2   | Flavonoid biosynthesis                                | 47    | 3    | 9.5604E-4       | 0.02046 |
| 3   | Phenylalanine, tyrosine, and tryptophan biosynthesis  | 22    | 2    | 0.0042195       | 0.02002 |
| 4   | Phenylpropanoid biosynthesis                          | 46    | 2    | 0.017904        | 0.03161 |
| 5   | Stilbenoid, diarylheptanoid and gingerol biosynthesis | 8     | 1    | 0.03723         | 0.13235 |
| 6   | Tyrosine metabolism                                   | 16    | 1    | 0.073265        | 0.10811 |
| 7   | Tryptophan metabolism                                 | 28    | 1    | 0.12515         | 0.12307 |
| 8   | Isoquinoline alkaloid biosynthesis                    | 6     | 1    | 0.028036        | 0.5     |
| 9   | Aminoacyl-tRNA biosynthesis                           | 46    | 2    | 0.017904        | 0       |
| 10  | Indole alkaloid biosynthesis                          | 4     | 1    | 0.018766        | 0       |
| 11  | Glycine, serine, and threonine metabolism             | 33    | 1    | 0.14602         | 0       |
| 12  | Ubiquinone and other terpenoid-quinone biosynthesis   | 38    | 1    | 0.16646         | 0       |
| 13  | Glucosinolate biosynthesis                            | 65    | 1    | 0.26976         | 0       |



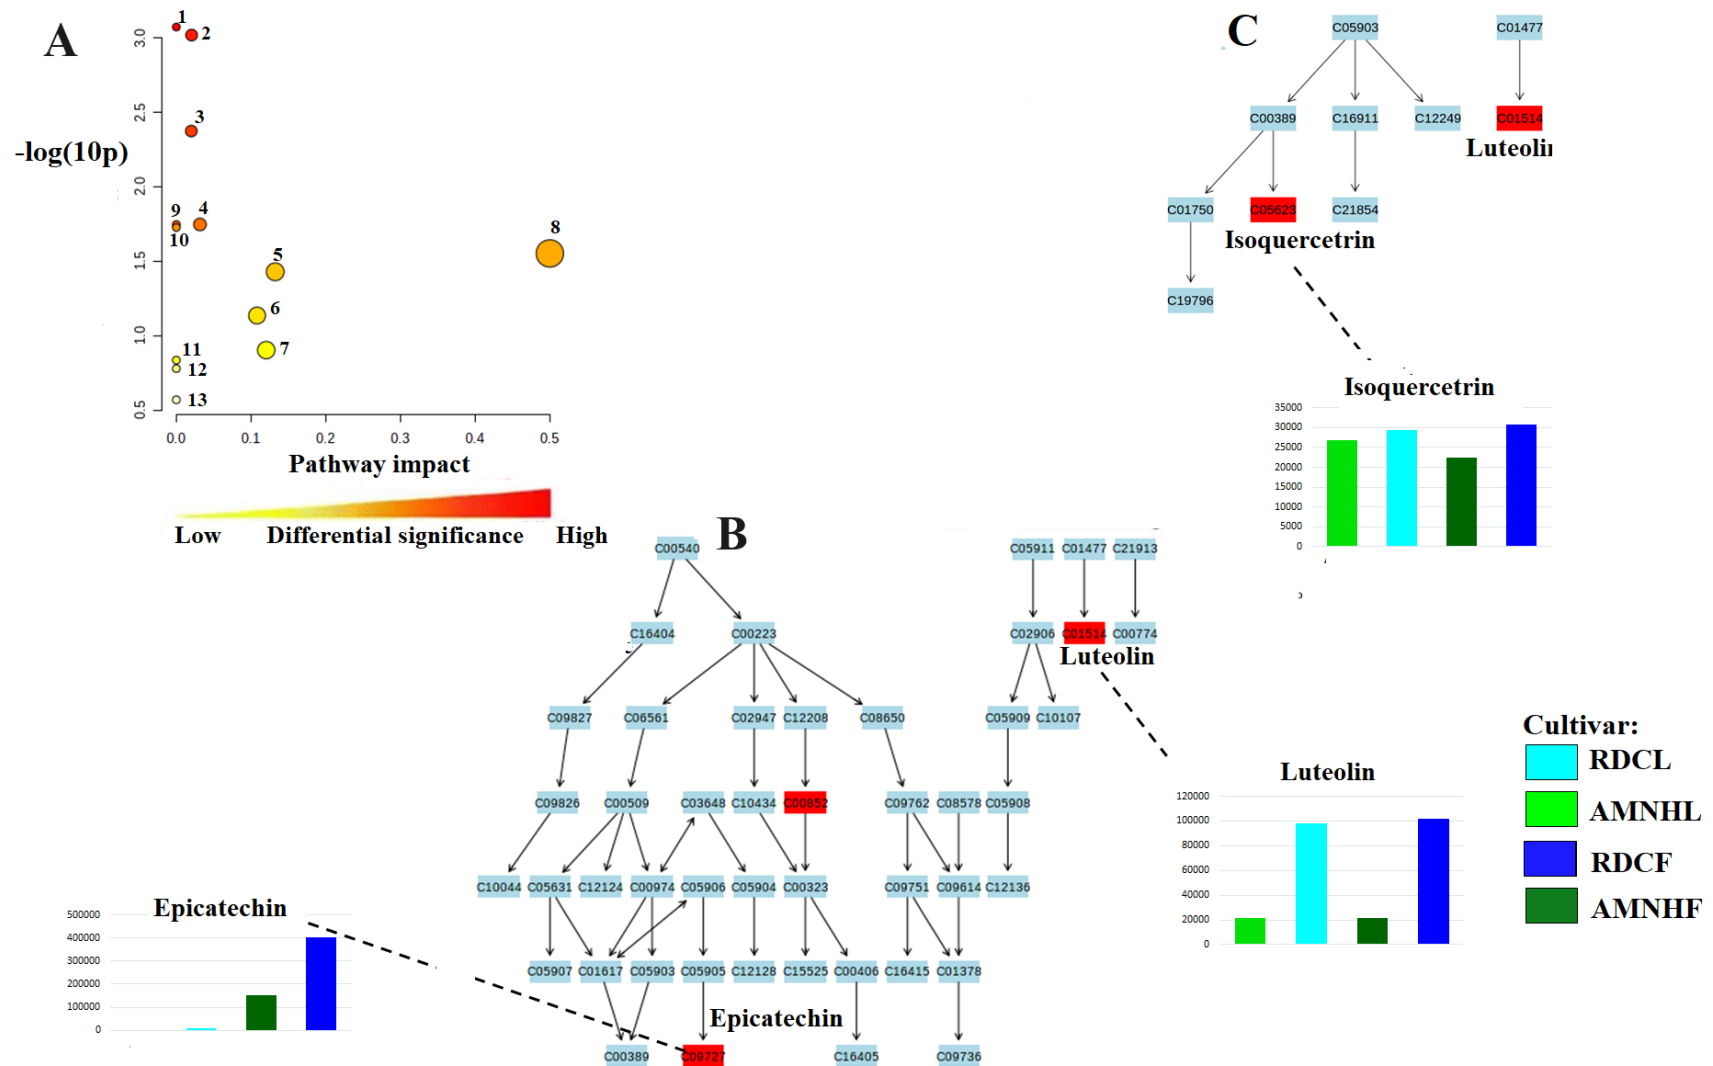

**Figure S3: Functional analysis.** Relative quantification of some metabolites identified across the leaves and flowers of AMNH and RDC cultivars. Summary of the metabolism pathways identified in the cannabis cultivars (A) where (B) represents the flavonoid and (C) flavone and flavanol biosynthesis pathways.

**Table S3:** Binding interactions identified for some cannabinoids and flavonoids ranked according to the docking score (binding affinity energy (kcal/mol), where a low docking score indicates good/significant interaction and a high score indicating bad/insignificant interaction between protein target and ligand).

| Target and Ligand                                                                                                | Interacting Residues                                           | Docking Score         |
|------------------------------------------------------------------------------------------------------------------|----------------------------------------------------------------|-----------------------|
| <b>Cannabinoid receptor 2 (CB2) &amp; <math>\Delta^9</math>-tetrahydrocannabinol (<math>\Delta^9</math>-THC)</b> | SER285 ,PHE281, VAL113, SER90                                  | <b>-10.3 kcal/mol</b> |
| <b>Cannabinoid receptor 1 (CB1) &amp; Cannabidiol (CBD)</b>                                                      | PHE108, PHE268, MET384, MET103, PHE170.                        | <b>-9.5 kcal/mol</b>  |
| <b>Caspase 3 &amp; Cannflavin A</b>                                                                              | SER144, THR143, GLU196, TRY200, PRO206, TRY202, ARG167         | <b>-9.3 kcal/mol</b>  |
| <b>Cannabinoid receptor 1 (CB1) &amp; <math>\Delta^9</math>-tetrahydrocannabinol (<math>\Delta^9</math>-THC)</b> | PHE108, PHE268, SER383, MET103, PHE170                         | <b>-9.2 kcal/mol</b>  |
| <b>Cannabinoid receptor 2 (CB1) &amp; Cannabidiol (CBD)</b>                                                      | HIS95, PHE91, PHE87, LYS109, PHE106, ILE110                    | <b>-9.2 kcal/mol</b>  |
| <b>Mitogen-Activated Protein Kinase 1 (MEK1) &amp; Apigenin</b>                                                  | TRP275, LEU294, LEU244, ILE243, ILE240, GLN236, PHE288, TRP212 | <b>-8.3 kcal/mol</b>  |
| <b>G-coupled receptor 55 (GPR55) &amp; Cannabidiol</b>                                                           | VAL103, LEU96, LEU72, LEU100                                   | <b>-7.8 kcal/mol</b>  |
| <b>Fas receptor &amp; Quercetin</b>                                                                              | GLU270, ASN268, GLU163, LYS152, ASN154, SER153                 | <b>-6.6 kcal/mol</b>  |
| <b>Vascular endothelial growth factor (VEGF) &amp; Kaempferol</b>                                                | LYS286, ASP276, ILE46, ILE48, SER50, ASP34, PHE36              | <b>-6.6 kcal/mol</b>  |
| <b>Tyrosine kinase &amp; Luteolin</b>                                                                            | ARG184, LYS182, TYR181, TRY209, GLY215, ILE193, SER194, ARG196 | <b>-6.0 kcal/mol</b>  |

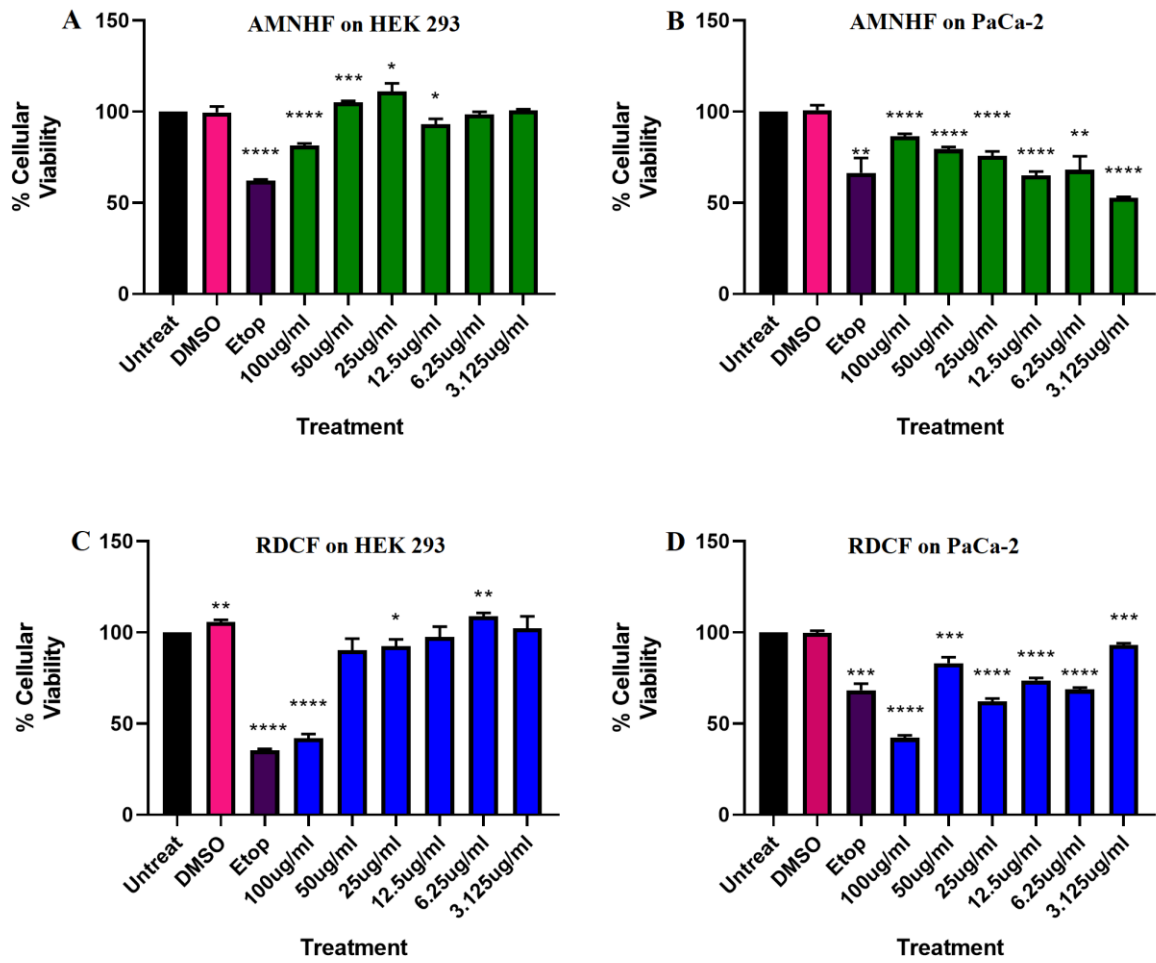

**Figure S4: Cell proliferation assessed by Alamar analysis:** (A) Percentage viability of HEK 293 (781.7  $\mu\text{g/ml}$ ) and (B) PaCa-2 cells (IC<sub>50</sub> of 3  $\mu\text{g/ml}$ ) following the 24-hour treatment with AMNHF respectively. (C) Percentage viability of HEK 293 (IC<sub>50</sub> 92.48  $\mu\text{g/ml}$ ) and (D) PaCa-2 cells (IC<sub>50</sub> of 65.17  $\mu\text{g/ml}$ ) following the 24-hour treatment with RDCF respectively. A T-test was performed to assess for statistical significance compared to the positive control (\*P < 0.05, \*\*P < 0.01, \*\*\*P < 0.001, \*\*\*\*P < 0.0001).
